# Supplementary material
Source: ML conference proceedings conference paper supplement (https://openreview.net/forum?id=oMHpejyGdx)

VGGFace2

Wikiart

Clean

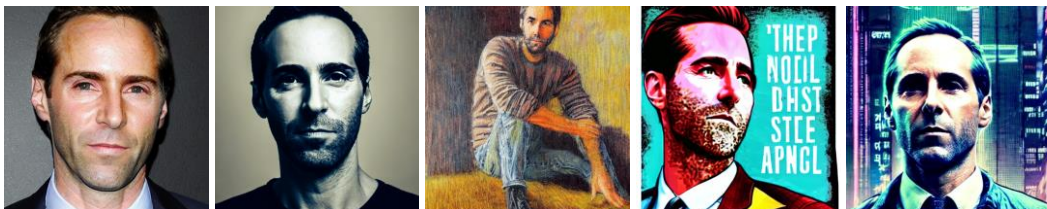

AdvDM

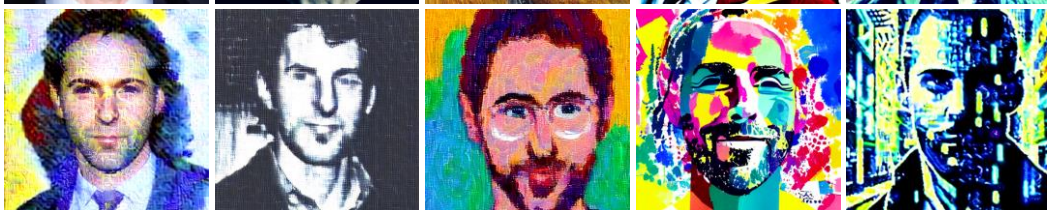

Anti-DB

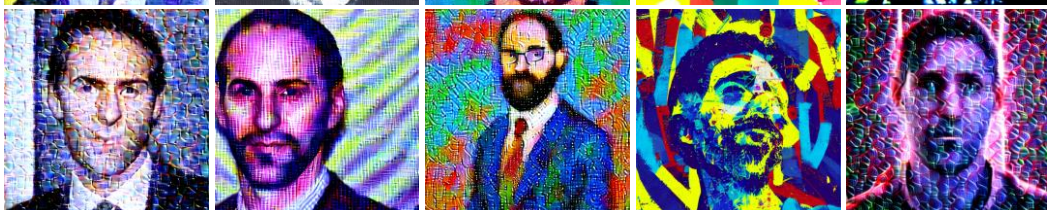

IAdvDM

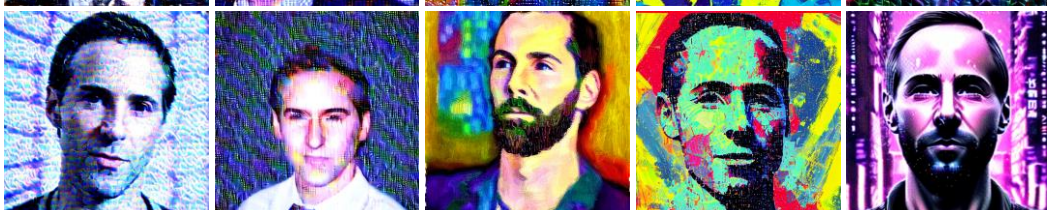PAP  
(Ours)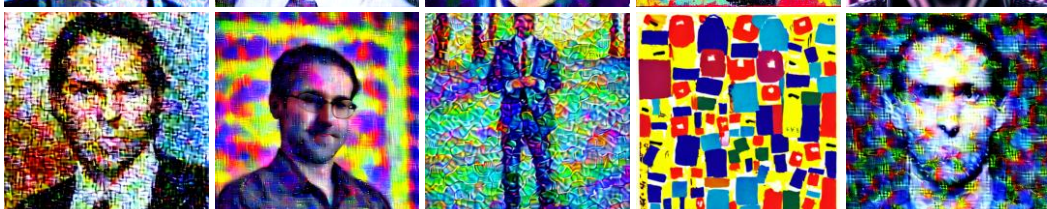Test  
Prompt:a photo of  
sks person.a dsfr  
portrait of  
sks person.an impressionistic  
depiction of sks  
person.an abstract  
representation  
of sks person.a cyberpunk  
style photo  
of sks person.

a sks painting.

a sks painting  
of a tree.a photo of a dog  
in the style of  
sks painting.a photo of a  
person in the  
style of sks  
painting.a sks painting  
of a starry night.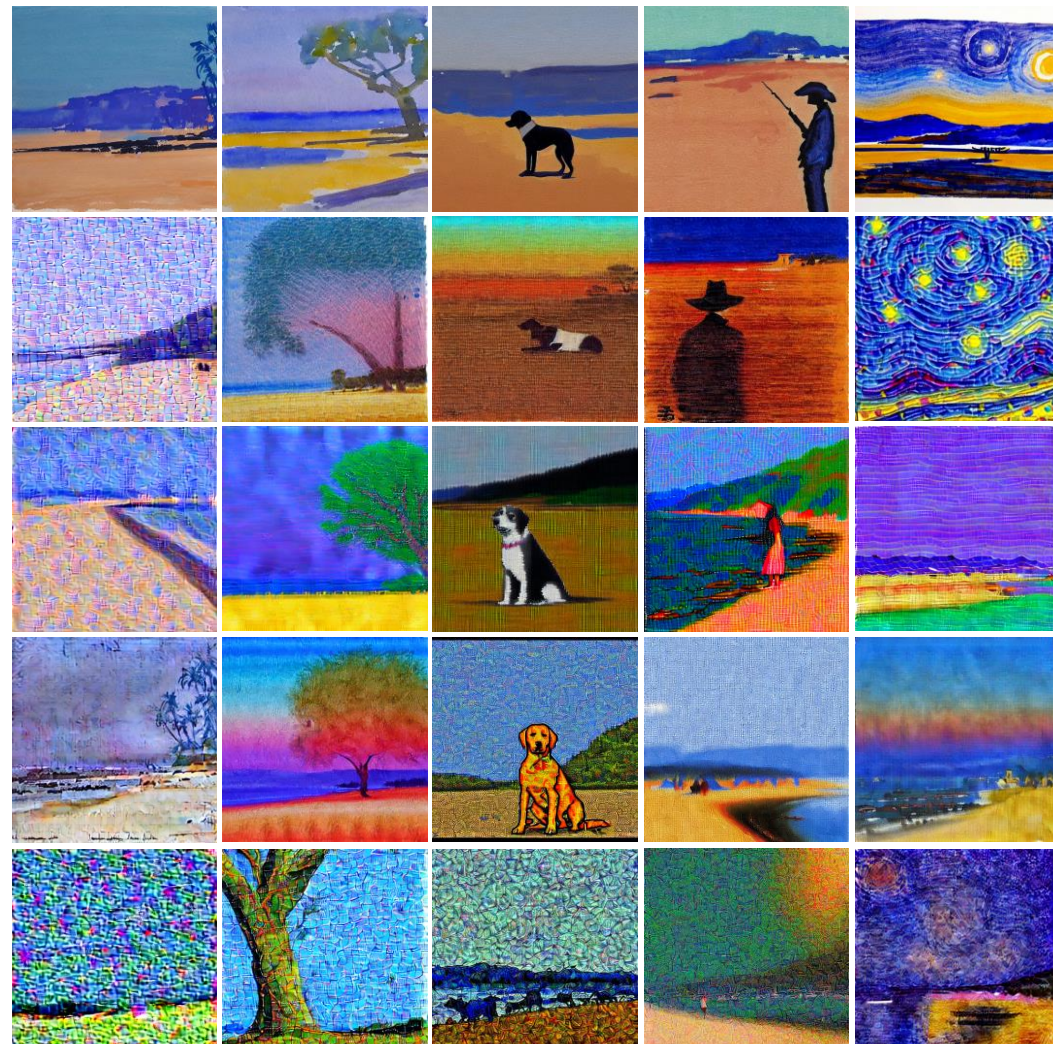

Supplement: supplementary_material [file attachment]
