# Supplementary material
Source: ML conference proceedings conference paper supplement (https://openreview.net/forum?id=oMHpejyGdx)

## Predefined prompt

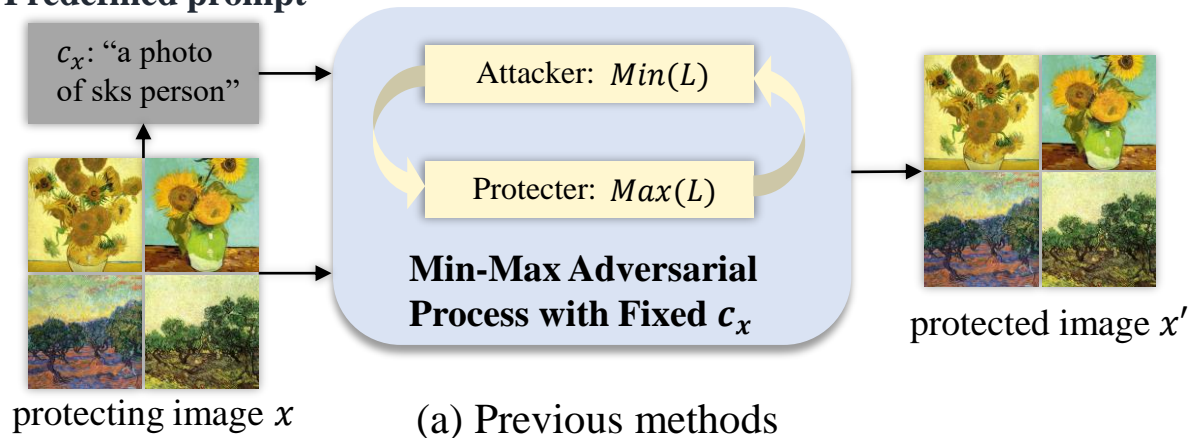

## Reference prompt

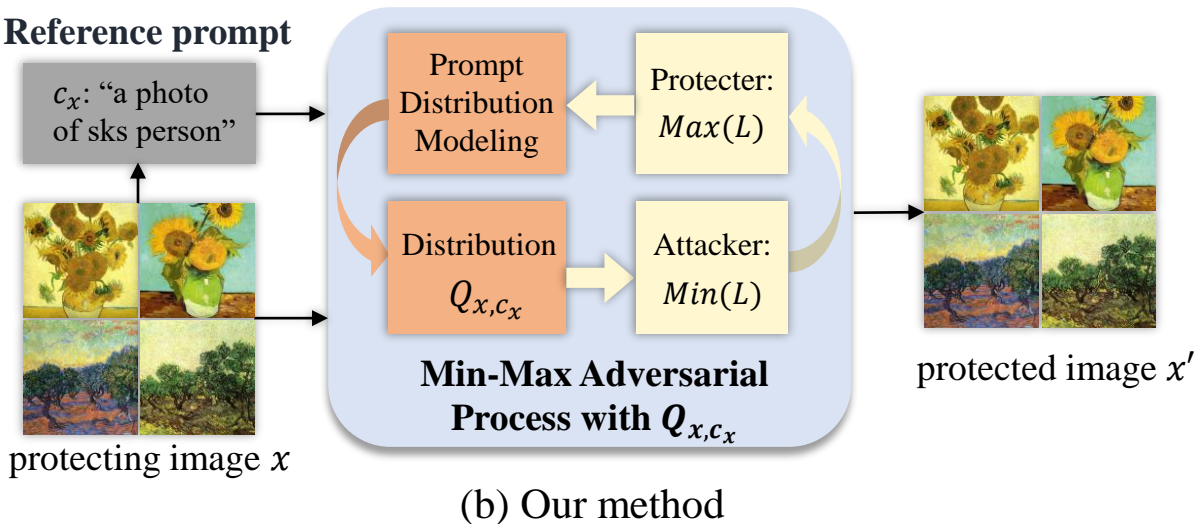

Supplement: supplementary_material [file attachment]
